# Supplementary material
Source: publisher figshare collection journal article supplement (https://asha.figshare.com/articles/dataset/_/7250282)
Supplement: Supplementary file 2 [file 1]

**Supplemental Table S1.** International Classification of Diseases, Ninth Revision (ICD-9) codes used to identify potential study participants.

| Group                     | ICD-9 codes                                                                                                                                                                                                                                                                                                                                                                                                                                                                                                                                                                                                                                                                                                                 |
|---------------------------|-----------------------------------------------------------------------------------------------------------------------------------------------------------------------------------------------------------------------------------------------------------------------------------------------------------------------------------------------------------------------------------------------------------------------------------------------------------------------------------------------------------------------------------------------------------------------------------------------------------------------------------------------------------------------------------------------------------------------------|
| A. Benign voice disorders | 333.1, Vocal tremor<br>462, Sore throat<br>478.30-478.79, Vocal fold paresis/paralysis, benign mass, edema, bowing, spasmodic dysphonia, & hyperfunction<br>784.42-784.49, Dysphonia/hypophonia                                                                                                                                                                                                                                                                                                                                                                                                                                                                                                                             |
| B. Neurologic conditions  | 331.9, Cerebral degeneration<br>332.0, Parkinson’s disease<br>333.0, Multiple systems atrophy<br>334.3-334.8, Ataxia<br>335.20-335.24, ALS<br>340, Multiple sclerosis<br>356.9, Peripheral neuropathy<br>358.01, Myasthenia gravis<br>359.21-359.71, Dystrophy/myositis<br>431, 434.91, 437.9, 438.13-438.89, V12.54 CVA/Effects of stroke<br>710.3-710.4, Myositis<br>781.0, Dystonia                                                                                                                                                                                                                                                                                                                                      |
| C. Head and neck cancer   | 140.1, Cancer of lower lip<br>141.0-141.9, Tongue cancer<br>142.0, Cancer of parotid gland<br>143.1, Cancer of lower gum<br>144.9-145.9, Cancer of floor of mouth, buccal cavity, palate, oral cancer<br>146.0-146.6, Tonsil cancer<br>147.9, Nasopharynx cancer<br>148.0-149.0, Cancer of hypopharynx<br>150.0-150.9, Cancer of cervical esophagus<br>160.0, Cancer of nasal cavity<br>161.0-161.9, Laryngeal cancer<br>171.0-173.92, Sarcoma of neck/squamous cell carcinoma<br>193, Thyroid cancer<br>195.0-198.89, Cancer of jaw, lymph nodes, or neck<br>235.6, Laryngeal neoplasm<br>526.89, Osteoradionecrosis of jaw<br>784.41, Aphonia<br>V15.29, History of parathyroidectomy<br>V55.0, Attention to tracheostomy |
| D. Hearing impairment     | 389.03-389.06, Conductive hearing loss<br>389.10-389.18, Sensorineural hearing loss<br>389.20-389.22, Mixed hearing loss<br>389.9, Unspecified hearing loss                                                                                                                                                                                                                                                                                                                                                                                                                                                                                                                                                                 |
