# Supplementary material
Source: publisher figshare collection journal article supplement (https://asha.figshare.com/articles/dataset/_/7250282)
Supplement: Supplementary file 3 [file 1]

**Supplemental Table S2.** Multiple regressions for all social and psychological variables.

| Predictor                   | Dependent variables       |             |         |                            |             |         |                          |             |         |                                 |             |         |                                    |             |         |
|-----------------------------|---------------------------|-------------|---------|----------------------------|-------------|---------|--------------------------|-------------|---------|---------------------------------|-------------|---------|------------------------------------|-------------|---------|
|                             | Social network:<br>Family |             |         | Social network:<br>Friends |             |         | Social network:<br>Total |             |         | Social participation:<br>Number |             |         | Social participation:<br>Frequency |             |         |
|                             | <i>B</i>                  | <i>SE B</i> | $\beta$ | <i>B</i>                   | <i>SE B</i> | $\beta$ | <i>B</i>                 | <i>SE B</i> | $\beta$ | <i>B</i>                        | <i>SE B</i> | $\beta$ | <i>B</i>                           | <i>SE B</i> | $\beta$ |
| Age                         | 0.159                     | 0.072       | 0.169*  | 0.069                      | 0.069       | 0.074   | 0.224                    | 0.119       | 0.142   | 0.005                           | 0.026       | 0.015   | 0.006                              | 0.009       | 0.050   |
| Gender                      | 1.411                     | 0.932       | 0.122   | 1.427                      | 0.894       | 0.124   | 2.790                    | 1.530       | 0.144   | 0.450                           | 0.320       | 0.108   | 0.275                              | 0.109       | 0.188   |
| Life partner                | 2.244                     | 1.036       | 0.184*  | −0.622                     | 0.999       | −0.051  | 1.689                    | 1.708       | 0.082   | 0.843                           | 0.359       | 0.191*  | 0.261                              | 0.122       | 0.168   |
| Annual income               | 0.417                     | 0.390       | 0.099   | 0.203                      | 0.378       | 0.048   | 0.604                    | 0.643       | 0.086   | 0.033                           | 0.137       | 0.021   | 0.014                              | 0.046       | 0.027   |
| Education                   | −1.228                    | 0.742       | −0.141  | −0.330                     | 0.706       | −0.039  | −1.497                   | 1.202       | −0.104  | 0.231                           | 0.253       | 0.074   | 0.012                              | 0.086       | 0.011   |
| Self-rated health           | 0.505                     | 0.650       | 0.077   | 0.593                      | 0.631       | 0.090   | 0.986                    | 1.074       | 0.089   | 0.007                           | 0.228       | 0.003   | 0.033                              | 0.077       | 0.040   |
| Health conditions           | −0.174                    | 0.277       | −0.053  | −0.292                     | 0.271       | −0.089  | −0.481                   | 0.458       | −0.088  | −0.061                          | 0.098       | −0.051  | −0.046                             | 0.033       | −0.11   |
| Functional limitations      | −1.372                    | 1.042       | −0.128  | −0.660                     | 1.020       | −0.062  | −2.136                   | 1.734       | −0.119  | −0.873                          | 0.378       | −0.219* | −0.235                             | 0.123       | −0.17   |
| Communication effectiveness | 0.017                     | 0.342       | 0.004   | 1.079                      | 0.332       | 0.275** | 1.057                    | 0.567       | 0.159   | 0.264                           | 0.121       | 0.187*  | 0.115                              | 0.040       | 0.230*  |
| <i>R</i> <sup>2</sup>       | 0.117                     |             |         | 0.173                      |             |         | 0.147                    |             |         | 0.212                           |             |         | 0.234                              |             |         |

\* $p < .05$ . \*\* $p < .01$ . \*\*\* $p < .001$ .

*Supplemental Table S2, continued.*

| Predictor                   | Dependent variables   |             |          |                          |             |          |                       |             |          |                                    |             |         |                            |             |         |
|-----------------------------|-----------------------|-------------|----------|--------------------------|-------------|----------|-----------------------|-------------|----------|------------------------------------|-------------|---------|----------------------------|-------------|---------|
|                             | Negative interactions |             |          | Social support: Guidance |             |          | Social support: Worth |             |          | Social support: Social integration |             |         | Social support: Attachment |             |         |
|                             | <i>B</i>              | <i>SE B</i> | $\beta$  | <i>B</i>                 | <i>SE B</i> | $\beta$  | <i>B</i>              | <i>SE B</i> | $\beta$  | <i>B</i>                           | <i>SE B</i> | $\beta$ | <i>B</i>                   | <i>SE B</i> | $\beta$ |
| Age                         | −0.070                | 0.023       | −0.230** | 0.030                    | 0.026       | 0.084    | 0.012                 | 0.023       | 0.038    | 0.052                              | 0.028       | 0.137   | 0.066                      | 0.029       | 0.166*  |
| Gender                      | −0.455                | 0.297       | −0.124   | 0.277                    | 0.321       | 0.066    | 0.135                 | 0.286       | 0.036    | 0.168                              | 0.345       | 0.037   | 0.711                      | 0.357       | 0.150*  |
| Life partner                | −0.275                | 0.333       | −0.071   | 0.200                    | 0.362       | 0.045    | −0.196                | 0.322       | −0.049   | 0.023                              | 0.388       | 0.005   | 0.819                      | 0.403       | 0.163*  |
| Annual income               | −0.215                | 0.125       | −0.160   | 0.114                    | 0.135       | 0.074    | 0.186                 | 0.120       | 0.135    | 0.170                              | 0.145       | 0.104   | 0.159                      | 0.150       | 0.092   |
| Education                   | 0.215                 | 0.233       | 0.079    | −0.108                   | 0.253       | −0.034   | 0.003                 | 0.225       | 0.001    | −0.080                             | 0.271       | −0.024  | −0.321                     | 0.282       | −0.091  |
| Self-rated health           | 0.123                 | 0.209       | 0.059    | 0.268                    | 0.229       | 0.111    | 0.113                 | 0.204       | 0.052    | 0.467                              | 0.246       | 0.182   | 0.478                      | 0.255       | 0.177   |
| Health conditions           | 0.025                 | 0.090       | 0.024    | 0.016                    | 0.097       | 0.014    | 0.060                 | 0.087       | 0.055    | −0.011                             | 0.105       | −0.009  | −0.070                     | 0.109       | −0.052  |
| Functional limitations      | 0.746                 | 0.354       | 0.213*   | −1.285                   | 0.366       | −0.330** | −1.004                | 0.326       | −0.287** | −0.578                             | 0.393       | −0.139  | −0.765                     | 0.407       | −0.175  |
| Communication effectiveness | 0.107                 | 0.110       | 0.086    | 0.056                    | 0.119       | 0.038    | 0.245                 | 0.106       | 0.188*   | 0.258                              | 0.129       | 0.167*  | 0.101                      | 0.133       | 0.062   |
| <i>R</i> <sup>2</sup>       | 0.108                 |             |          | 0.193                    |             |          | 0.213                 |             |          | 0.188                              |             |         | 0.208                      |             |         |

\**p* < .05. \*\**p* < .01. \*\*\**p* < .001.

*Supplemental Table S2, continued.*

| Predictor                          | Dependent variable         |             |         |                          |             |         |                       |             |         |                      |             |         |            |             |          |
|------------------------------------|----------------------------|-------------|---------|--------------------------|-------------|---------|-----------------------|-------------|---------|----------------------|-------------|---------|------------|-------------|----------|
|                                    | Social support: Nurturance |             |         | Social support: Alliance |             |         | Social support: Total |             |         | Social Self-efficacy |             |         | Loneliness |             |          |
|                                    | <i>B</i>                   | <i>SE B</i> | $\beta$ | <i>B</i>                 | <i>SE B</i> | $\beta$ | <i>B</i>              | <i>SE B</i> | $\beta$ | <i>B</i>             | <i>SE B</i> | $\beta$ | <i>B</i>   | <i>SE B</i> | $\beta$  |
| <b>Age</b>                         | −.013                      | .033        | −.028   | .020                     | .027        | .056    | .160                  | .122        | .091    | .068                 | .045        | .114    | −.059      | .044        | −.097    |
| <b>Gender</b>                      | −.505                      | .409        | −.091   | .355                     | .338        | .083    | 1.091                 | 1.517       | .052    | .561                 | .571        | .077    | −.215      | .568        | −.029    |
| <b>Life partner</b>                | 1.984                      | .460        | .336*** | −.113                    | .380        | −.025   | 2.657                 | 1.703       | .120    | .598                 | .640        | .078    | −.720      | .637        | −.091    |
| <b>Annual income</b>               | −.070                      | .171        | −.035   | .161                     | .142        | .104    | .762                  | .637        | .100    | −.303                | .239        | −.115   | .029       | .239        | .011     |
| <b>Education</b>                   | .012                       | .322        | .003    | −.367                    | .266        | −.115   | −.820                 | 1.191       | −.053   | −.235                | .448        | −.043   | .501       | .446        | .090     |
| <b>Self-rated health</b>           | .332                       | .292        | .105    | .143                     | .241        | .059    | 1.989                 | 1.086       | .168    | −.123                | .407        | −.029   | .083       | .401        | .019     |
| <b>Health conditions</b>           | .023                       | .124        | .015    | −.059                    | .102        | −.048   | −.060                 | .459        | −.010   | −.167                | .173        | −.081   | .306       | .172        | .144     |
| <b>Functional limitations</b>      | −1.027                     | .466        | −.200*  | −.887                    | .385        | −.225*  | −5.206                | 1.743       | −.270** | −.236                | .647        | −.035   | .612       | .643        | .089     |
| <b>Communication effectiveness</b> | .121                       | .152        | .063    | .162                     | .126        | .110    | .899                  | .568        | .125    | .929                 | .209        | .371*** | −.946      | .208        | −.374*** |
| <b><i>R</i><sup>2</sup></b>        | .252                       |             |         | .135                     |             |         | .273                  |             |         | .145                 |             |         | .191       |             |          |

\*  $p < .05$ ; \*\*  $p < .01$ ; \*\*\*  $p < .001$

*Table S2, continued.*

| <b>Predictor</b>                   | <b>Dependent variable</b> |             |         |
|------------------------------------|---------------------------|-------------|---------|
|                                    | <b>Depression</b>         |             |         |
|                                    | <i>B</i>                  | <i>SE B</i> | $\beta$ |
| <b>Age</b>                         | −0.115                    | 0.056       | −0.150* |
| <b>Gender</b>                      | −0.320                    | 0.714       | −0.034  |
| <b>Life partner</b>                | −0.008                    | 0.799       | −0.001  |
| <b>Annual income</b>               | −0.130                    | 0.299       | −0.038  |
| <b>Education</b>                   | 1.368                     | 0.560       | 0.196*  |
| <b>Self-rated health</b>           | −0.235                    | 0.509       | −0.043  |
| <b>Health conditions</b>           | 0.265                     | 0.217       | 0.100   |
| <b>Functional limitations</b>      | 2.228                     | 0.808       | 0.255** |
| <b>Communication effectiveness</b> | −0.639                    | 0.261       | −0.199* |
| <b><i>R</i><sup>2</sup></b>        | 0.196                     |             |         |

\* $p < .05$ . \*\* $p < .01$ . \*\*\* $p < .001$ .
